# Supplementary material for: Trends and Hospital Outcomes in HOSPITAL Admissions for Anaphylaxis in Children with and without Asthma in Spain (2016–2021)
Source: MDPI journal article supplement (doi:10.3390/jcm12196387), 2023-10-06
Supplement: s1 [file s1]

**Table S1.** ICD-10 diagnosis and procedures codes used in this investigation.

| Variable                                  | ICD-10                                |
|-------------------------------------------|---------------------------------------|
| Anaphylaxis                               | T78.0xx, T78.2xxx, T80.5xxx, T88.6xxx |
| Anaphylactic reaction due to food, n (%)  | T78.0xx                               |
| Anaphylactic reaction due to serum, n (%) | T80.5xxx                              |
| Anaphylactic reaction due to drugs, n (%) | T88.6xxx                              |
| Anaphylactic shock, unspecified, n (%)    | T78.2xxx                              |
| Asthma, n (%)                             | J45                                   |
| Noninvasive mechanical ventilation, n (%) | 5A09357, 5A09457, 5A09557             |
| Invasive mechanical ventilation, n (%)    | 5A1945Z, 5A1955Z, 5A1935Z             |
